# Supplementary material
Source: publisher figshare collection journal article supplement (https://rs.figshare.com/ndownloader/files/7831780)
Supplement: Supplementary file 1 [file 7831780]

## Sheet: Sheet1
Subject	q	E	Bee Tag	Colony	P(Best)	P(Best) Final 40	sugar 1-40	sugar 41-80	P(Sugar) 1-40	P(sugar) 41-80	Sampling Period	P(sample) block 2	P(sample) block 1
1	0.99	1	ORANGE68	AD1	0.2375	0.35	0.028275	0.03219	0.65	0.74	80	0	0
2	0.73	0.28	ORANGE96	AD1	0.4875	0.625	0.0345825	0.056115	0.753555	0.895833	1.975	0.9375	1.31812
3	0.99	0.28	WHITE59	AD1	0.575	0.775	0.0176175	0.0732975	0.574468	0.8425	3.43478	0	0
4	0.86	0.28	WHITE10	AD1	0.475	0.475	0.034365	0.02175	0.607692	0.617284	3.29167	0.368421	0.652251
5	0.86	1	ORANGE80	AD1	0.65	0.475	0.027405	0.025665	0.9	0.7375	7.9	0.409091	0.693981
6	0.60	2	WHITE75	AD1	0.5125	0.45	0.02697	0.02088	0.855172	0.727273	4.64706	0.5	0.785398
7	0.60	0.28	WHITE11	AD1	0.5	0.575	0.0263175	0.0263175	0.453184	0.537778	14.5	0.0789474	0.284811
8	0.60	1	WHITE50	AD1	0.525	0.45	0.024795	0.024795	0.780822	0.721519	3.7619	0.409091	0.693981
9	0.73	2	WHITE33	AD1	0.45	0.6	0.02523	0.0271875	0.789116	0.886525	19.75	0.166667	0.420534
10	0.73	1	ORANGE16	AD1	0.5	0.55	0.026535	0.0261	0.73494	0.769231	4.52941	0.478261	0.763652
11	0.86	2	ORANGE47	AD1	0.4625	0.425	0.024795	0.023055	0.820144	0.779412	6.58333	0.162162	0.414458
12	0.99	2	WHITE20	AD1	0.5	0.45	0.02349	0.0219675	0.765957	0.737226	2.63333	0.625	0.911738
13	0.60	2	YELLOW96	AD2	0.6125	0.6	0.0261	0.026535	0.857143	0.841379	6.07692	0.666667	0.955317
14	0.99	2	BLUE90	AD3	0.45	0.075	0.02349	0.0267525	0.892562	0.76875	11.2857	0.166667	0.420534
15	0.73	2	BLUE62	AD3	0.55	0.45	0.027405	0.0224025	0.851351	0.730496	3.3913	0.8	1.10715
16	0.73	1	BLUE48	AD3	0.5125	0.625	0.023925	0.024795	0.696203	0.791667	4.9375	0.0714286	0.27055
17	0.86	0.28	BLUE71	AD3	0.525	0.575	0.03828	0.0558975	0.611111	0.732194	6.07692	0.666667	0.955317
18	0.86	1	BLUE16	AD3	0.6125	0.7	0.02523	0.03306	0.753247	0.863636	2.92593	1	1.5708
19	0.99	0.28	GREEN1	AD3	0.8125	0.85	0.022185	0.02349	0.85	0.9	5.26667	0.15	0.397699
20	0.86	2	BLUE29	AD3	0.4875	0.45	0.0245775	0.0267525	0.81295	0.825503	6.58333	0.4	0.684719
21	0.60	0.28	BLUE44	AD3	0.525	0.65	0.0284925	0.0261	0.548117	0.550459	6.58333	0	0
22	0.73	0.28	BLUE50	AD3	0.55	0.5	0.05046	0.0441525	0.846715	0.802372	2.39394	0.857143	1.1832
23	0.99	1	BLUE75	AD3	0.5625	0.775	0.016965	0.022185	0.6	0.85	2.32353	0.225	0.494216
24	0.60	1	BLUE25	AD3	0.525	0.55	0.02697	0.025665	0.756098	0.766234	4.52941	0.454545	0.739881
25	0.99	0.28	WHITE50	AD4	0.775	0.875	0.0563325	0.0793875	0.877966	0.9125	7.09091	0	0
26	0.99	1	WHITE42	AD4	0.7125	0.675	0.03915	0.031755	0.9	0.848837	6.07692	0.923077	1.28976
27	0.86	1	WHITE62	AD4	0.6125	0.575	0.027405	0.033495	0.818182	0.819149	8.77778	1	1.5708
28	0.73	1	WHITE78	AD4	0.425	0.475	0.024795	0.02523	0.695122	0.734177	2.02564	1	1.5708
29	0.73	2	WHITE86	AD4	0.4375	0.475	0.0245775	0.02697	0.801418	0.855172	15.8	0	0
30	0.73	0.28	WHITE49	AD4	0.4625	0.5	0.0319725	0.0324075	0.510417	0.543796	9.875	0.2	0.463648
31	0.86	2	WHITE55	AD4	0.45	0.5	0.02436	0.0261	0.783217	0.839161	7.18182	0.176471	0.433538
32	0.60	0.28	WHITE25	AD4	0.5125	0.475	0.0519825	0.0441525	0.810169	0.780769	2.39394	0.894737	1.24037
33	0.99	2	WHITE4	AD4	0.5	0.625	0.0293625	0.0311025	0.84375	0.899371	80	0	0
34	0.60	1	WHITE57	AD4	0.575	0.525	0.02871	0.02871	0.814815	0.776471	2.82143	0.823529	1.13726
35	0.60	2	WHITE85	AD4	0.4875	0.425	0.0241425	0.021315	0.776224	0.715328	2.63333	0.652174	0.940025
36	0.86	0.28	WHITE9	AD4	0.55	0.475	0.0419775	0.0284925	0.762846	0.517787	5.64286	0.238095	0.50974
37	0.99	2	WHITE34	AD4	0.4	0.375	0.0297975	0.0293625	0.85625	0.84375	80	0	0
38	0.73	1	ORANGE46	AD5	0.475	0.6	0.022185	0.03045	0.662338	0.813953	3.7619	0.75	1.0472
39	0.86	2	ORANGE51	AD5	0.55	0.475	0.02436	0.024795	0.823529	0.808511	4.9375	0.285714	0.563943
40	0.73	0.28	ORANGE14	AD5	0.6	0.65	0.04698	0.061335	0.808989	0.854545	3.03846	0.916667	1.27795
41	0.99	1	ORANGE5	AD5	0.35	0.35	0.03219	0.030015	0.74	0.726316	26.3333	0.5	0.785398
42	0.73	2	ORANGE69	AD5	0.4875	0.5	0.0224025	0.0245775	0.751825	0.824818	4.64706	0.0810811	0.288743
43	0.60	2	ORANGE54	AD5	0.525	0.525	0.0237075	0.02349	0.778571	0.765957	2.96296	0.875	1.20943
44	0.60	1	ORANGE98	AD5	0.5375	0.475	0.025665	0.025665	0.786667	0.7375	2.54839	0.714286	1.00685
45	0.86	1	ORANGE35	AD5	0.6625	0.6	0.02871	0.02697	0.857143	0.794872	8.77778	0.294118	0.573203
46	0.86	0.28	ORANGE42	AD5	0.6	0.6	0.04785	0.055245	0.82397	0.803797	3.25	0.769231	1.0697
47	0.99	0.28	ORANGE66	AD5	0.9	0.875	0.0824325	0.0793875	0.9475	0.9125	80	0	0
48	0.60	0.28	ORANGE28	AD5	0.45	0.475	0.037845	0.0261	0.589831	0.517241	5.64286	0.162162	0.414458
49	0.60	0.28	GREEN6	AD3	0.4	0.4	0.0328425	0.0358875	0.631799	0.572917	3.03846	0.458333	0.743683
50	0.73	1	BLUE5	AD3	0.5	0.475	0.026535	0.023055	0.7625	0.716216	4.38889	0.576923	0.862628
51	0.73	2	GREEN30	AD3	0.5	0.5	0.0241425	0.0258825	0.816176	0.843972	9.875	0.142857	0.387597
52	0.99	2	BLUE61	AD3	0.625	0.75	0.023055	0.02175	0.757143	0.833333	3.43478	0.25	0.523599
53	0.60	2	GREEN18	AD3	0.575	0.525	0.025665	0.023925	0.848921	0.797101	5.26667	0.428571	0.713724
54	0.60	1	GREEN33	AD3	0.6375	0.6	0.031755	0.028275	0.848837	0.802469	4.33333	0.5	0.785398
55	0.86	0.28	GREEN34	AD6	0.4875	0.45	0.0467625	0.04089	0.746528	0.70412	2.7931	0.727273	1.02133
56	0.86	1	GREEN31	AD6	0.5375	0.55	0.02871	0.027405	0.776471	0.777778	3.7619	0.555556	0.841069
57	0.99	1	GREEN33	AD6	0.6	0.55	0.02523	0.01827	0.805556	0.7	2.92593	0.45	0.735314
58	0.99	0.28	GREEN42	AD6	0.45	0.325	0.0358875	0.02523	0.60219	0.39322	19.75	0.05	0.225513
59	0.73	0.28	GREEN22	AD6	0.625	0.625	0.028275	0.0511125	0.577778	0.712121	15.8	0.285714	0.563943
60	0.86	2	GREEN71	AD6	0.675	0.725	0.0245775	0.0237075	0.837037	0.858268	5.64286	0.233333	0.50413
61	0.86	1	GREEN2	AD6	0.525	0.575	0.02697	0.026535	0.746988	0.782051	3.7619	0.526316	0.811726
62	0.99	2	GREEN39	AD6	0.2125	0.1	0.0276225	0.02697	0.808917	0.775	19.75	0	0
63	0.73	0.28	GREEN11	AD6	0.5125	0.475	0.0432825	0.04698	0.765385	0.75	2.72414	0.789474	1.09412
64	0.86	0.28	ORANGE22	AD6	0.6375	0.6	0.0261	0.0337125	0.56872	0.580524	80	0	0
65	0.99	1	ORANGE27	AD6	0.7125	0.8	0.019575	0.026535	0.75	0.884058	4.52941	0.142857	0.387597
66	0.60	1	WHITE39	AD6	0.5125	0.55	0.02523	0.028275	0.734177	0.783133	2.16667	0.888889	1.23096
67	0.60	0.28	GREEN40	AD6	0.625	0.6	0.0450225	0.0515475	0.796154	0.864964	3.29167	1	1.5708
68	0.73	2	WHITE13	AD6	0.3625	0.375	0.023925	0.0261	0.769231	0.827586	11.2857	0	0
69	0.86	2	GREEN4	AD6	0.55	0.5	0.0241425	0.0263175	0.834586	0.834483	9.875	0.157895	0.408638
70	0.60	2	WHITE45	AD6	0.4625	0.55	0.02088	0.0271875	0.690647	0.85034	3.43478	0.363636	0.647285
71	0.99	0.28	WHITE97	AD6	0.825	0.925	0.0506775	0.0824325	0.896154	0.9475	7.18182	0	0
72	0.73	1	GREEN48	AD6	0.625	0.65	0.030015	0.03045	0.811765	0.833333	2.72414	1	1.5708
73	0.73	2	GREEN7	AD5	0.425	0.475	0.02088	0.024795	0.705882	0.820144	4.15789	0.129032	0.367422
74	0.60	2	ORANGE53	AD5	0.5	0.525	0.022185	0.023055	0.733813	0.796992	3.29167	0.194444	0.456666
75	0.99	0.28	ORANGE88	AD5	0.9	0.875	0.05307	0.0793875	0.938462	0.9125	39.5	0	0
76	0.73	0.28	ORANGE96	AD5	0.4625	0.55	0.035235	0.040455	0.606742	0.696629	3.54545	0.529412	0.814827
77	0.99	2	ORANGE87	AD5	0.7625	0.95	0.018705	0.02523	0.716667	0.966667	4.38889	0.025	0.15878
78	0.86	0.28	YELLOW23	AD5	0.4	0.45	0.016095	0.03741	0.524823	0.6121	2.5	0.5	0.785398
79	0.86	2	YELLOW63	AD5	0.6	0.525	0.0276225	0.023055	0.852349	0.746479	5.37037	0.894737	1.24037
80	0.86	1	BLUE52	AD5	0.5875	0.575	0.026535	0.027405	0.792208	0.7875	40	0.0909091	0.306277
81	0.73	1	YELLOW81	AD5	0.4875	0.4	0.02871	0.024795	0.795181	0.703704	3.95	0.478261	0.763652
82	0.99	1	YELLOW34	AD5	0.875	0.925	0.023055	0.024795	0.883333	0.95	7.9	0.075	0.277406
83	0.60	1	ORANGE47	AD5	0.5375	0.4	0.026535	0.0261	0.824324	0.714286	7.9	0.235294	0.506445
84	0.60	0.28	YELLOW91	AD5	0.575	0.55	0.04437	0.0522	0.829268	0.854093	2.63333	0.947368	1.33932
85	0.86	2	WHITE31	AD6	0.4875	0.575	0.0228375	0.0263175	0.76087	0.876812	8.66667	0.0454545	0.21485
86	0.73	0.28	ORANGE37	AD6	0.425	0.5	0.02262	0.0271875	0.422764	0.555556	5.26667	0.32	0.601264
87	0.99	0.28	WHITE71	AD6	0.7625	0.9	0.019575	0.02436	0.75	0.933333	4.15789	0.1	0.321751
88	0.86	1	WHITE14	AD11	0.6375	0.65	0.023925	0.02436	0.785714	0.8	9.875	0.1	0.321751
89	0.73	1	WHITE63	AD6	0.4875	0.475	0.025665	0.02523	0.746835	0.734177	4.15789	0.25	0.523599
90	0.99	2	GREEN10	AD11	0.8625	0.95	0.0328425	0.034365	0.94375	0.9875	80	0	0
91	0.60	1	WHITE17	AD11	0.575	0.525	0.028275	0.02523	0.8125	0.753247	3.08	0.619048	0.9056
92	0.86	0.28	WHITE32	AD11	0.6125	0.8	0.04089	0.0696	0.786611	0.911681	3.16	0.625	0.911738
93	0.99	1	WHITE20	AD11	0.4125	0.5	0.02088	0.0348	0.64	0.8	5.26667	0	0
94	0.60	0.28	GREEN18	AD11	0.575	0.575	0.0532875	0.0367575	0.79288	0.667984	4.15789	0.318182	0.599314
95	0.73	2	WHITE44	AD11	0.65	0.6	0.0261	0.0261	0.909091	0.869565	26.3333	0.0952381	0.313728
96	0.60	2	WHITE64	AD11	0.55	0.65	0.024795	0.02523	0.802817	0.878788	11.2857	0.0344828	0.186779
